# Supplementary material for: What do the Transcriptome and Proteome of Menstrual Blood-derived Mesenchymal Stem Cells Tell us about Endometriosis?
Source: Preprints.org preprint supplement (doi:10.20944/preprints202209.0180.v1), 2022-09-13
Supplement: Supplementary file 1 [file supplementary]

## Sheet: DE_end_vs_control_p-ad 0.1
Table S1: Differential expression transcripts with FDR< 0.1 and no FC cut-off
ensembl_gene_id	hgnc_symbol	gene category	entrezgene_id	chromosome_name	start_position	end_position	wikigene_description	baseMean	log2FoldChange	lfcSE	stat	pvalue	padj
ENSG00000227896	ENSG00000227896	ncRNA	NA	10	86521945	86525101	Novel Transcript	19.3741	-1.20311	0.281042	-4.28089	1.86e-05	0.0159484
ENSG00000247137	ENSG00000247137	ncRNA	NA	11	83184491	83193794	ANKRD42 Divergent Transcript	57.604	-0.866136	0.194208	-4.45984	8.2e-06	0.00998738
ENSG00000273329	ENSG00000273329	ncRNA	NA	7	129604548	129611630	Novel Transcript	110.881	-0.840981	0.218075	-3.85638	0.000115078	0.056648
ENSG00000267598	ENSG00000267598	ncRNA	NA	19	13153071	13154193	Novel Transcript, Antisense To IER2	14.1785	2.05126	0.431224	4.75683	1.97e-06	0.00381671
ENSG00000257453	ENSG00000257453	ncRNA	120766149	12	76030494	76031378	PHLDA1 Antisense RNA 1	8.06016	2.39759	0.550947	4.35177	1.35e-05	0.013397
ENSG00000251143	ENSG00000251143	ncRNA	100128494	11	72014291	72020910	uncharacterized LOC100128494	29.5568	2.45414	0.496523	4.94265	7.71e-07	0.00195115
ENSG00000265401	ENSG00000265401	ncRNA	NA	17	16382152	16382669	Novel Transcript	30.0811	2.57391	0.493339	5.21732	1.82e-07	0.000898668
ENSG00000269968	ENSG00000269968	ncRNA	NA	12	6537794	6538370	Novel Transcript, Antisense To GAPDH	58.5855	2.60077	0.499362	5.20817	1.91e-07	0.000898668
ENSG00000272512	ENSG00000272512	ncRNA	NA	1	995966	998051	Novel Transcript	7.59987	2.73135	0.662909	4.12025	3.78e-05	0.0297235
ENSG00000234961	ENSG00000234961	ncRNA	NA	10	17233325	17234833	Novel Transcript	15.946	2.82122	0.61387	4.59579	4.31e-06	0.00677166
ENSG00000272540	ENSG00000272540	ncRNA	NA	6	30723105	30723877	Novel Transcript, Antisense To TUBB	10.9438	2.90477	0.753861	3.85319	0.000116589	0.056648
ENSG00000261026	ENSG00000261026	ncRNA	NA	8	22679013	22684009	Novel Transcript, Overlapping To EGR3	59.8988	2.96852	0.561097	5.29056	1.22e-07	0.000898668
ENSG00000269888	ENSG00000269888	ncRNA	NA	3	161429112	161429613	Novel Transcript	13.7453	3.38879	0.713291	4.75092	2.02e-06	0.00381671
ENSG00000258017	ENSG00000258017	ncRNA	NA	12	49127782	49188484	Novel Transcript, Antisense To TUBA1B	21.2667	3.70643	0.91592	4.04668	5.2e-05	0.036267
ENSG00000278621	THBS1-AS1	ncRNA	NA	15	39588357	39588882	THBS1 Antisense RNA 1	5.79631	4.50186	0.961724	4.68103	2.85e-06	0.00489106
ENSG00000212719	LINC02693	ncRNA	339263	17	21428263	21574517	long intergenic non-protein coding RNA 2693	10.6424	4.63747	1.07784	4.30256	1.69e-05	0.015912
ENSG00000229124	VIM-AS1	ncRNA	100507347	10	17214239	17229985	VIM antisense RNA 1	176.726	2.05239	0.369529	5.55408	2.79e-08	0.000526031
ENSG00000162772	ATF3	protein coding	467	1	212565334	212620777	activating transcription factor 3	687.968	1.78204	0.48429	3.67971	0.000233503	0.0991585
ENSG00000214212	C19orf38	protein coding	255809	19	10836575	10869790	chromosome 19 open reading frame 38	7.23047	1.75606	0.466043	3.76802	0.000164549	0.073847
ENSG00000121898	CPXM2	protein coding	119587	10	123706207	123940267	carboxypeptidase X, M14 family member 2	20.1519	2.6475	0.689907	3.83748	0.000124305	0.0585756
ENSG00000144655	CSRNP1	protein coding	64651	3	39141855	39154562	cysteine and serine rich nuclear protein 1	2131.28	1.07695	0.265768	4.05222	5.07e-05	0.036267
ENSG00000120738	EGR1	protein coding	1958	5	138465479	138469303	early growth response 1	5727.9	1.21748	0.308877	3.94163	8.09e-05	0.049207
ENSG00000125740	FOSB	protein coding	2354	19	45467995	45475179	FosB proto-oncogene, AP-1 transcription factor subunit	3191.3	1.50465	0.337915	4.45275	8.48e-06	0.00998738
ENSG00000114315	HES1	protein coding	3280	3	194136148	194138732	hes family bHLH transcription factor 1	991.5	2.10347	0.420729	4.99959	5.75e-07	0.00195115
ENSG00000125968	ID1	protein coding	3397	20	31605283	31606515	inhibitor of DNA binding 1, HLH protein	1498.68	1.28267	0.328771	3.90142	9.56e-05	0.0546224
ENSG00000117318	ID3	protein coding	3399	1	23557926	23559501	inhibitor of DNA binding 3, HLH protein	3091.85	1.53036	0.339881	4.50263	6.71e-06	0.00903638
ENSG00000211643	IGLV5-52	protein coding	28779	22	22318727	22319226	immunoglobulin lambda variable 5-52	5.15104	4.81894	1.25106	3.85189	0.000117209	0.056648
ENSG00000050555	LAMC3	protein coding	10319	9	131009174	131094473	laminin subunit gamma 3	192.576	2.18742	0.55006	3.9767	6.99e-05	0.0439053
ENSG00000248672	LY75-CD302	protein coding	100526664	2	159771851	159904710	LY75-CD302 readthrough	5.29168	2.96918	0.782577	3.7941	0.000148178	0.068122
ENSG00000123358	NR4A1	protein coding	3164	12	52022832	52059507	nuclear receptor subfamily 4 group A member 1	1199.87	1.96557	0.509355	3.85895	0.000113877	0.056648
ENSG00000153234	NR4A2	protein coding	4929	2	156324437	156342348	nuclear receptor subfamily 4 group A member 2	99.9359	1.99397	0.465733	4.28135	1.86e-05	0.0159484
ENSG00000119508	NR4A3	protein coding	8013	9	99821855	99866891	nuclear receptor subfamily 4 group A member 3	54.7362	2.20043	0.598561	3.6762	0.00023673	0.0991585
ENSG00000070087	PFN2	protein coding	5217	3	149964904	150050788	profilin 2	4398.33	-0.52405	0.124126	-4.22191	2.42e-05	0.0198519
ENSG00000124216	SNAI1	protein coding	6615	20	49982980	49988886	snail family transcriptional repressor 1	250.034	1.47387	0.336681	4.37766	1.2e-05	0.0128363
ENSG00000157734	SNX22	protein coding	79856	15	64151715	64157481	sorting nexin 22	19.1676	1.9681	0.491765	4.00212	6.28e-05	0.0408037
ENSG00000128016	ZFP36	protein coding	7538	19	39406847	39409412	ZFP36 ring finger protein	2314.67	1.51225	0.385504	3.92278	8.75e-05	0.0515601
ENSG00000181126	HLA-V	pseudogene	352962	6	29790954	29797811	major histocompatibility complex, class I, V (pseudogene)	5.28584	-5.57282	1.23003	-4.53063	5.88e-06	0.00852687
ENSG00000230202	ENSG00000230202	pseudogene	NA	6	117998975	117999448	Ribosomal Protein L29 (RPL29) pseudogene	70.9106	-5.29005	1.31567	-4.02081	5.8e-05	0.0390433
ENSG00000231995	ENSG00000231995	pseudogene	NA	9	62266319	62266919	Ribosomal Protein L7a Pseudogene 76	6.47506	-3.19769	0.731243	-4.37294	1.23e-05	0.0128363
ENSG00000227766	ENSG00000227766	pseudogene	353003	6	29942075	29943067	HLA Complex Group 4 Pseudogene 5	43.3369	1.96061	0.477959	4.10204	4.1e-05	0.0308762
ENSG00000271581	ENSG00000271581	pseudogene	NA	6	31356647	31357637	HLA Complex Group 4 (HCG4) Pseudogene	33.5759	2.22598	0.447911	4.96968	6.71e-07	0.00195115
